# Supplementary material for: Metabolomic Profiling of Dongxiang Wild Rice Under Salinity Demonstrates the Significant Role of Amino Acids in Rice Salt Stress
Source: PubMed Central journal article supplement (PMC8494129; doi:10.3389/fpls.2021.729004), 2021-09-22
Supplement: Image_1.pdf [file Image_1.pdf]

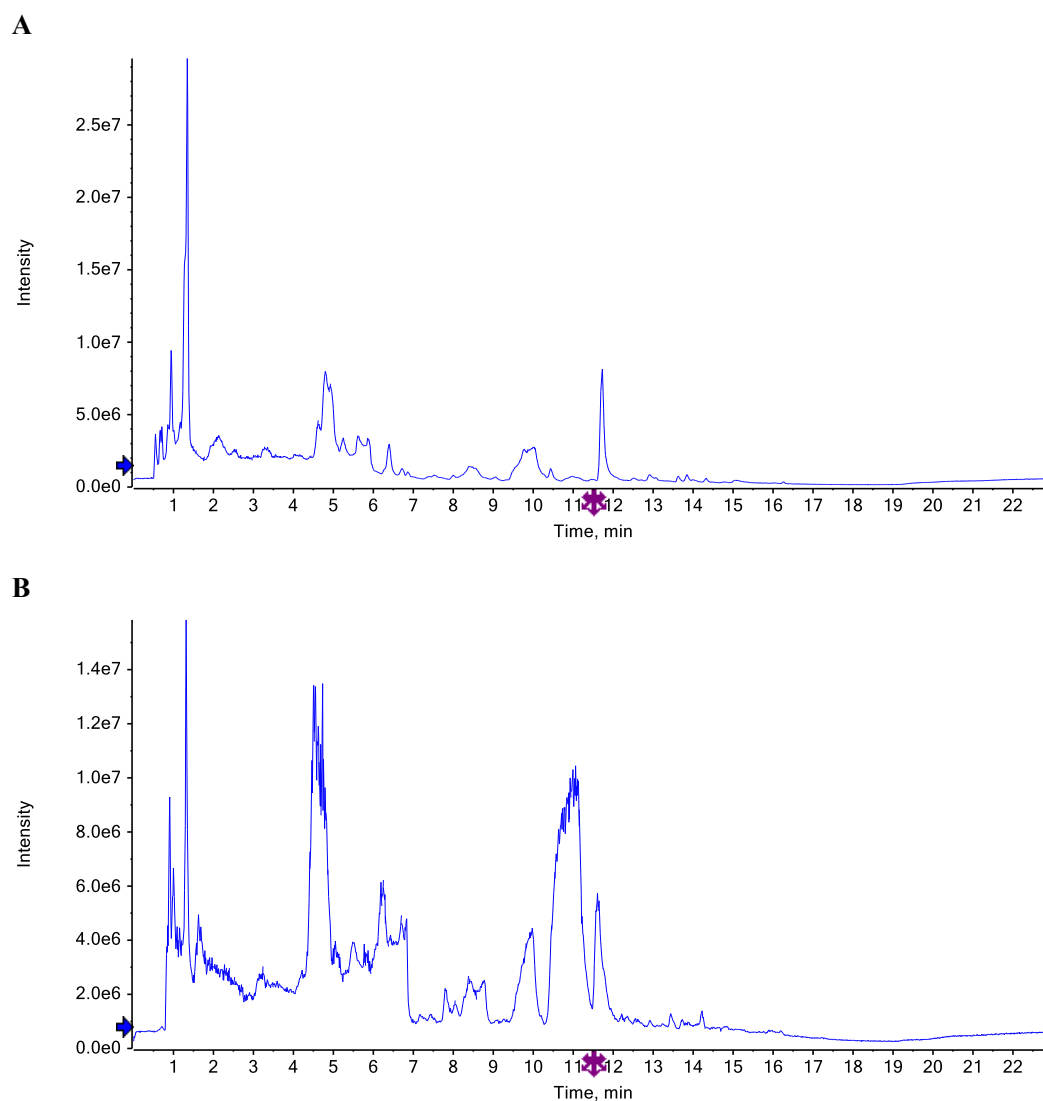

**FIGURE S1** The total ion chromatogram (TIC) of metabolites determined by UHPLC-Q-TOF-MS in DN (A) and DS (B) rice. DN is rice without salt treatment, and DS is salt-tolerant rice under salt stress.
