# Supplementary material for: Metabolomic Profiling of Dongxiang Wild Rice Under Salinity Demonstrates the Significant Role of Amino Acids in Rice Salt Stress
Source: PubMed Central journal article supplement (PMC8494129; doi:10.3389/fpls.2021.729004), 2021-09-22
Supplement: Image_2.pdf [file Image_2.pdf]

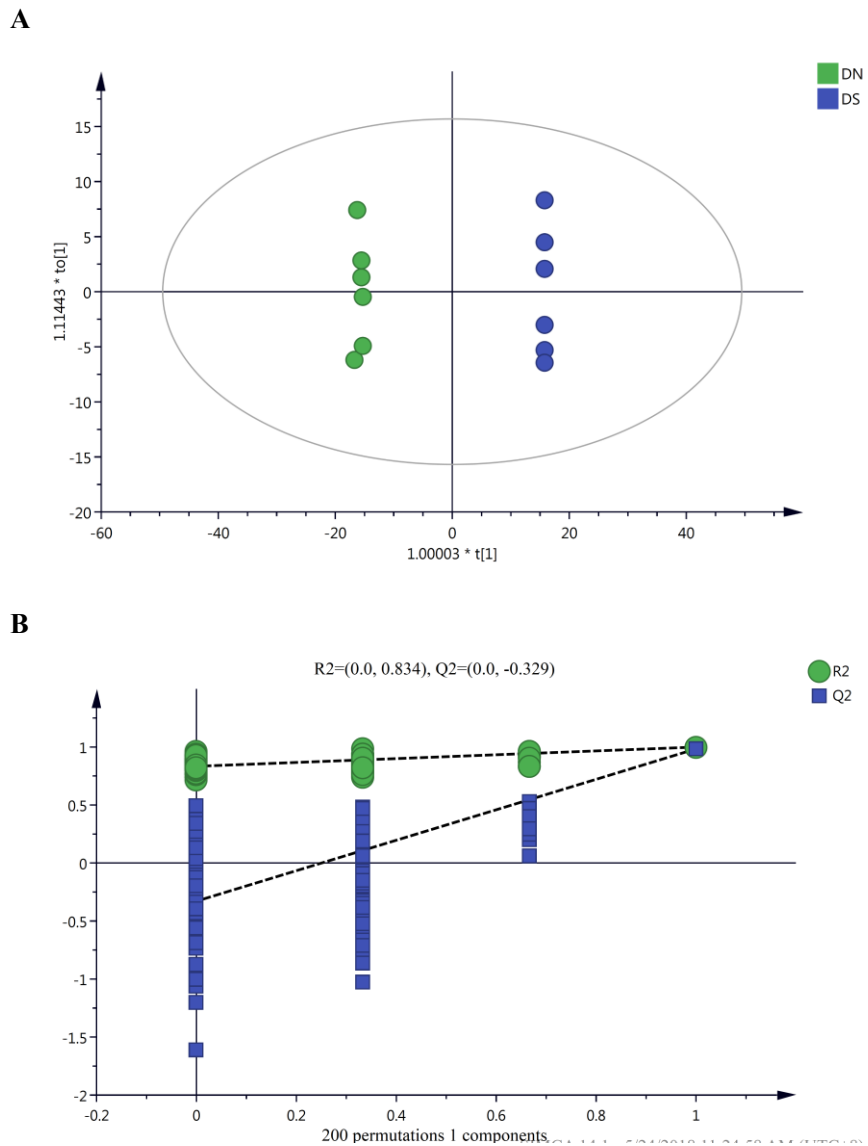

**FIGURE S2** Orthogonal partial least squares discriminant analysis (OPLS-DA) and permutation testing for Rice leaves. OPLS-DA score plots between DN and DS samples. (A). Permutation testing of the OPLS-DA models of DN and DS samples (B). DN is rice without salt treatment, and DS is salt-tolerant rice under salt stress.
